# Supplementary material for: Da Vinci SP Single-Port Robotic Surgery in Gynecologic Tumors: Single Surgeon’s Initial Experience with 100 Cases
Source: PubMed Central journal article supplement — Yonsei Med J. 2022 Jan 20;63(2):179–86. doi: 10.3349/ymj.2022.63.2.179 (PMC8819406; doi:10.3349/ymj.2022.63.2.179), 2022-01-20
Supplement: ymj-63-179-s001.pdf [file ymj-63-179-s001.pdf]

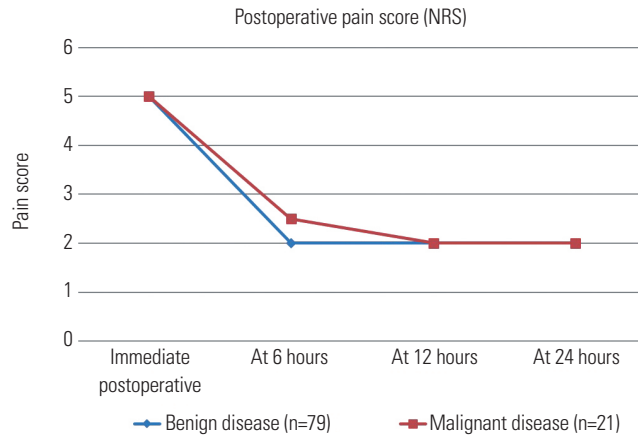

**Supplementary Fig. 1.** Postoperative pain score in patients who underwent da Vinci SP gynecologic surgery (n=100). NRS, numeral rating scale.
